# Supplementary material for: Clinical and functional significance of CHK1-S, an alternatively spliced isoform of the CHK1 gene, in hepatocellular carcinoma
Source: PubMed Central journal article supplement (PMC7052871; doi:10.7150/jca.39443), 2020-01-17
Supplement: jcav11p1792s1.pdf [file jcav11p1792s1.pdf]

**Supplementary table 1. List of differentially-expressed genes associated with alternative splicing in HCC.**

| Gene Symbol | Fold Change (linear) (tumor vs. normal) | ANOVA p-value (tumor vs. normal) | Description                                                                                                      |
|-------------|-----------------------------------------|----------------------------------|------------------------------------------------------------------------------------------------------------------|
| HNRNPAB     | 2.18                                    | 0.001738                         | heterogeneous nuclear ribonucleoprotein A/B                                                                      |
| MBNL2       | -2.19                                   | 0.02638                          | muscleblind-like splicing regulator 2; muscleblind-like 2 (Drosophila)                                           |
| RBM34       | 2.24                                    | 0.000116                         | RNA binding motif protein 34                                                                                     |
| RBMS3       | -3.06                                   | 0.001742                         | RNA binding motif, single stranded interacting protein 3; RNA binding motif, single stranded interacting protein |
| RRM2        | 2.2                                     | 0.00235                          | ribonucleotide reductase M2; ribonucleotide reductase M2 polypeptide                                             |
| SRPK1       | 2.04                                    | 0.003844                         | SRSF protein kinase 1                                                                                            |
